# Supplementary material for: AlPd15B7: a new superconducting cage-compound with an anti-Yb3Rh4Sn13-type of structure
Source: Royal Society of Chemistry journal article supplement (doi:10.1039/c5dt04751j), 2016-01-01
Supplement: c5dt04751j1.pdf [file c5dt04751j1.pdf]

**Supplementary Information for**

**“AlPd<sub>15</sub>B<sub>7</sub>: a new superconducting cage-compound with *anti*-Yb<sub>3</sub>Rh<sub>4</sub>Sn<sub>13</sub>-type of structure”**

*Qiang Zheng,<sup>a</sup> Walter Schnelle,<sup>a</sup> Yurii Prots,<sup>a</sup> Matej Bobnar,<sup>a</sup> Ulrich Burkhardt,<sup>a</sup> Andreas  
Leithe-Jasper<sup>a</sup> and Roman Gumeniuk,<sup>\*a,b</sup>*

<sup>a</sup> *Max-Planck-Institut für Chemische Physik fester Stoffe, Nöthnitzer Str. 40, 01187 Dresden,  
Germany*

<sup>b</sup> *Institut für Experimentelle Physik, TU Bergakademie Freiberg, Leipziger Str. 23,  
09596 Freiberg, Germany*

*\* E-mail address: roman.gumeniuk@physik.tu-freiberg.de*

**Table S1.** Interatomic distances (Å) in the AlPd<sub>15</sub>B<sub>7</sub> structure

| Atoms |       | Distances | CN       |          |    |
|-------|-------|-----------|----------|----------|----|
| Al    | -6Pd2 | 2.730(1)  | 12       |          |    |
|       | -6Pd3 | 2.752(1)  |          |          |    |
| Pd1   | -2B2  | 2.079(3)  | 14       |          |    |
|       | -2Pd3 | 2.774(1)  |          |          |    |
|       | -2Pd2 | 2.782(1)  |          |          |    |
|       | -2Pd2 | 2.857(1)  |          |          |    |
|       | -2Pd2 | 2.976(1)  |          |          |    |
|       | -2Pd3 | 3.012(1)  |          |          |    |
|       | -2Pd3 | 3.214(1)  |          |          |    |
|       | Pd2   | -1B3      |          | 2.139(6) | 15 |
|       |       | -1B1      |          | 2.217(1) |    |
|       |       | -1B2      |          | 2.252(1) |    |
| -1Pd3 |       | 2.714(2)  |          |          |    |
| -1Al  |       | 2.730(1)  |          |          |    |
| -1Pd1 |       | 2.782(1)  |          |          |    |
| -1Pd2 |       | 2.850(2)  |          |          |    |
| -1Pd1 |       | 2.857(1)  |          |          |    |
| -1Pd2 |       | 2.885(2)  |          |          |    |
| -1Pd3 |       | 2.885(2)  |          |          |    |
| -2Pd2 |       | 2.942(2)  |          |          |    |
| -1Pd3 |       | 2.955(2)  |          |          |    |
| -1Pd1 |       | 2.976(1)  |          |          |    |
| -1Pd2 |       | 3.391(1)  |          |          |    |
| Pd3   |       | -1B2      | 2.156(2) | 14       |    |
|       |       | -1B3      | 2.157(5) |          |    |
|       |       | -1B3      | 2.28(2)  |          |    |
|       | -1Pd2 | 2.714(2)  |          |          |    |
|       | -1Al  | 2.752(1)  |          |          |    |
|       | -1Pd1 | 2.774(2)  |          |          |    |
|       | -2Pd3 | 2.789(2)  |          |          |    |
|       | -1Pd2 | 2.885(1)  |          |          |    |
|       | -2Pd3 | 2.921(2)  |          |          |    |
|       | -1Pd2 | 2.955(2)  |          |          |    |
|       | -1Pd1 | 3.012(1)  |          |          |    |
|       | -1Pd1 | 3.214(1)  |          |          |    |

|    |       |          |   |
|----|-------|----------|---|
| B1 | -6Pd2 | 2.217(1) | 6 |
| B2 | -2Pd1 | 2.079(3) | 6 |
|    | -2Pd3 | 2.156(2) |   |
|    | -2Pd2 | 2.252(1) |   |
| B3 | -2Pd2 | 2.139(6) | 6 |
|    | -2Pd3 | 2.157(5) |   |
|    | -2Pd3 | 2.28(2)  |   |

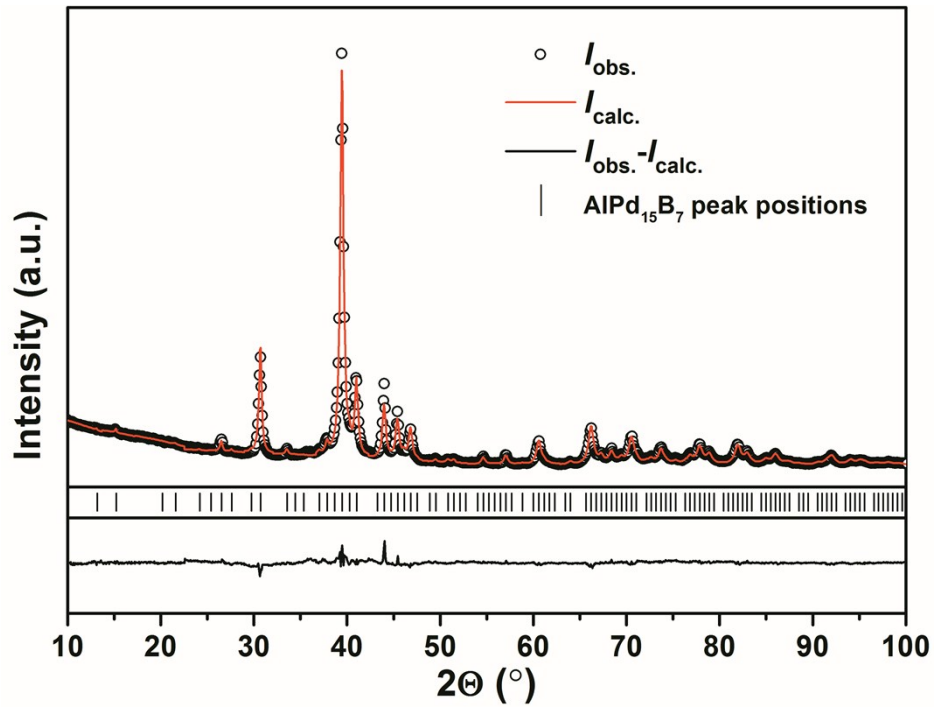

**Figure S1.** X-ray diffraction pattern of powders of an as-cast  $\text{AlPd}_{15}\text{B}_7$  sample without stress annealing, showing broadening of all reflections, due to the ductility of the sample.

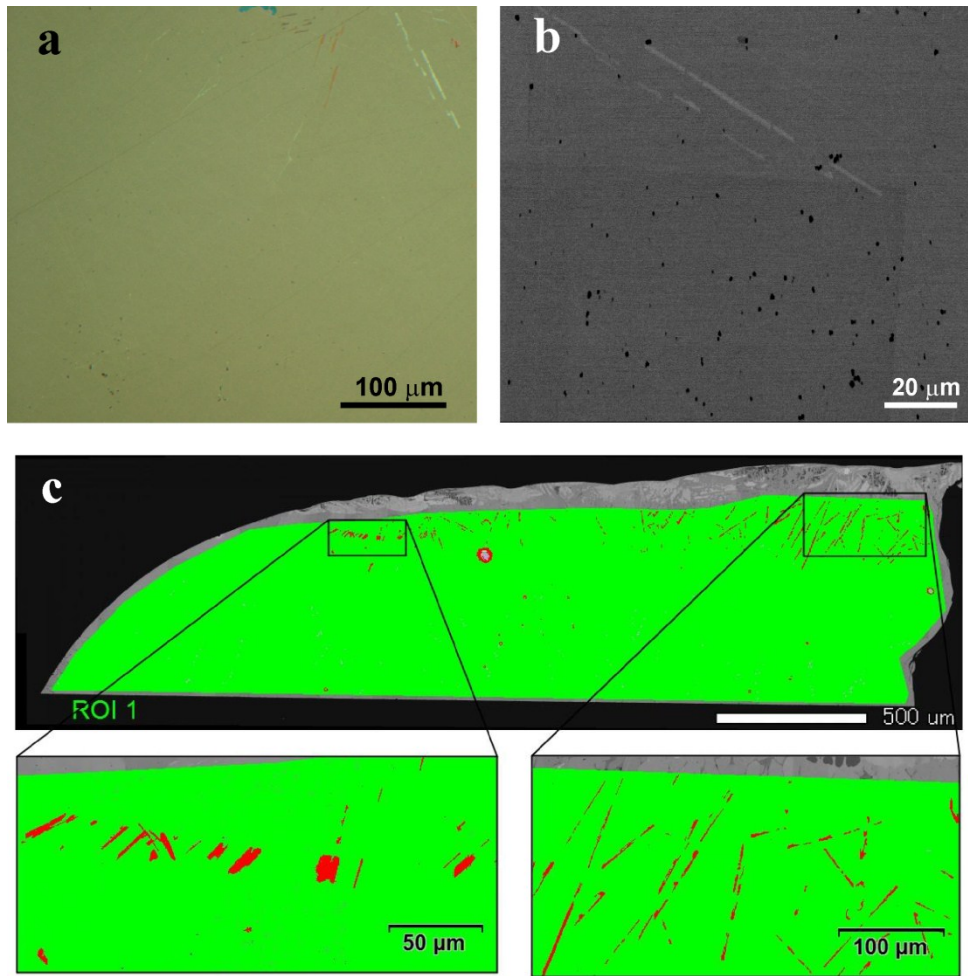

**Figure S2.** Microstructure of an as-cast  $\text{AlPd}_{15}\text{B}_7$  sample: (a) an image from optical microscope and (b) a BSE image in SEM, both revealing a very low amount of impurities in this sample; (c) EDXS mapping, where green and red contrasts belong to the  $\text{AlPd}_{15}\text{B}_7$  phase and impurities, respectively.

The content of impurities is less than 1 vol.%

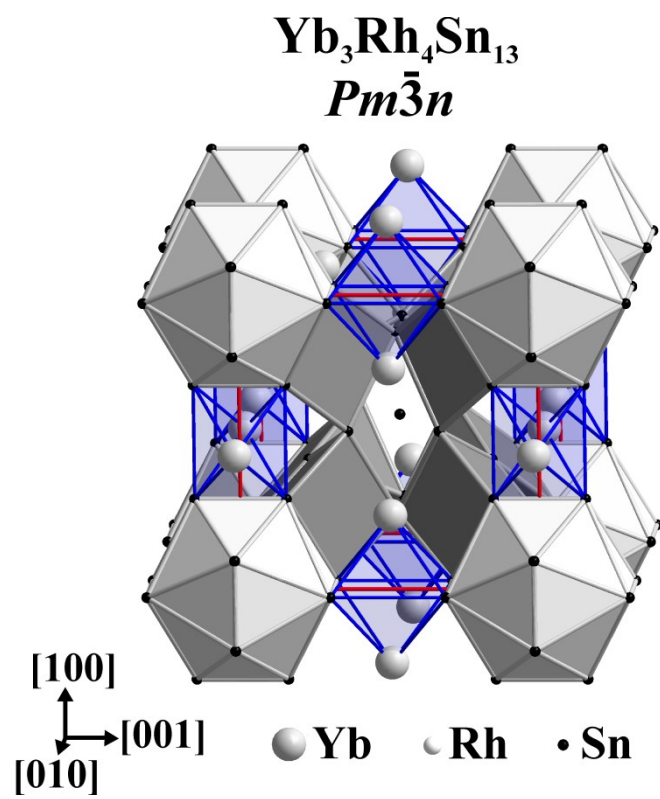

**Figure S3.** Crystal structure of Yb<sub>3</sub>Rh<sub>4</sub>Sn<sub>13</sub>. [Sn@Sn<sub>12</sub>] icosahedra – light gray; [Rh@Sn<sub>6</sub>] trigonal prisms – dark gray; [□@Yb<sub>2</sub>Sn<sub>4</sub>] octahedra – blue.

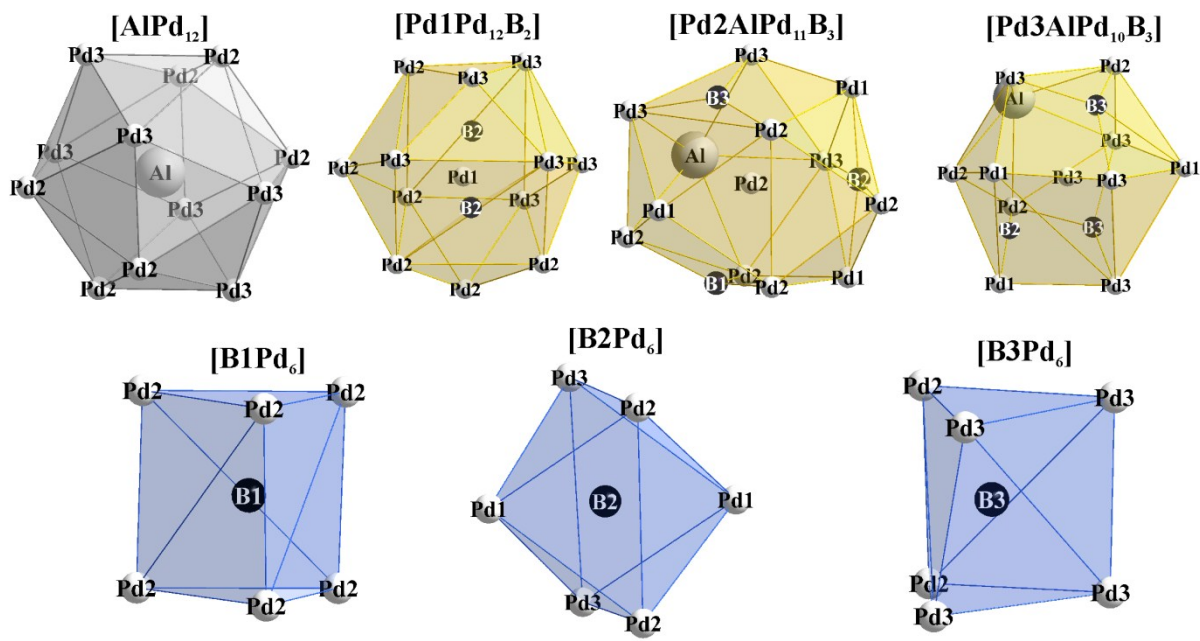

Figure S4. Coordination polyhedra in AlPd<sub>15</sub>B<sub>7</sub>

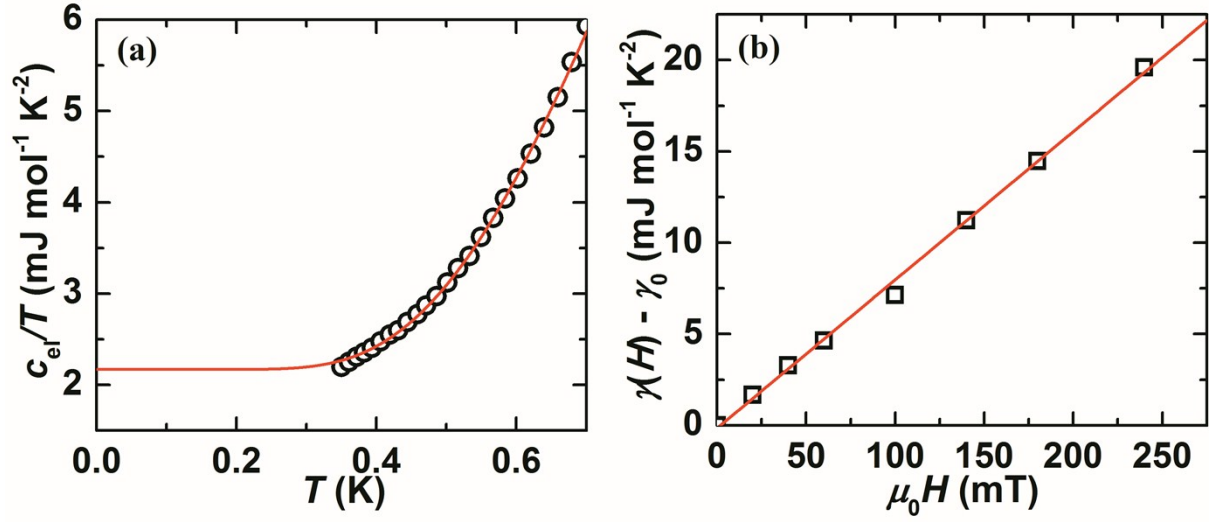

**Figure S5.** (a) Temperature dependence of  $c_{el}/T$  with the fit to  $c_{el} = \gamma_0 T + \gamma T_c A e^{\frac{-\Delta(0)}{k_B T}}$ ; (b)  $\gamma(H) - \gamma_0$  as a function of magnetic field  $\mu_0 H$ . The solid line shows a linear dependence of  $\gamma(H) - \gamma_0$  vs  $\mu_0 H$ , indicating a typical  $s$ -wave gap for  $\text{AlPd}_{15}\text{B}_7$ .
